# Supplementary material for: The effect of the magnitude and direction of the dipoles of organic cations on the electronic structure of hybrid halide perovskites
Source: Royal Society of Chemistry journal article supplement (doi:10.1039/c9cp02866h), 2019-01-01
Supplement: c9cp02866h1.pdf [file c9cp02866h1.pdf]

# Supplementary information for publication: Effect of the magnitude and direction of the dipole of the organic cation on the electronic structure of hybrid halide perovskites

Sudeep Maheshwari,<sup>†</sup> Sameer Patwardhan,<sup>‡</sup> George C. Schatz,<sup>‡</sup> Nicolas  
Renaud,<sup>¶</sup> and Ferdinand C. Grozema<sup>\*,†</sup>

<sup>†</sup>*Department of Chemical Engineering, Delft University of Technology, P.O. Box 5045,  
2629 HZ Delft, The Netherlands*

<sup>‡</sup>*Argonne-Northwestern Solar Energy Research (ANSER) Center and Department of  
Chemistry, Northwestern University, Evanston, Illinois 60208-3113, United States*

<sup>¶</sup>*Netherlands eScience Center, Science Park 140 1098 XG Amsterdam, The Netherlands*

E-mail: f.c.grozema@tudelft.nl

Figure 1 shows the relaxed geometries of parallel and anti-parallel oriented methylammonium cation along with the plot of respective bandstructures. As seen here, there is little effect of relaxation on the electronic properties of the material.

## Relaxed geometry

a.

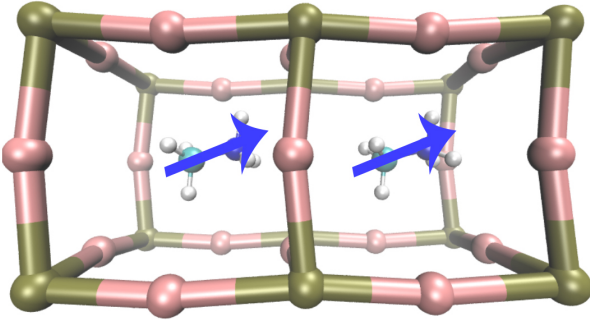

c.

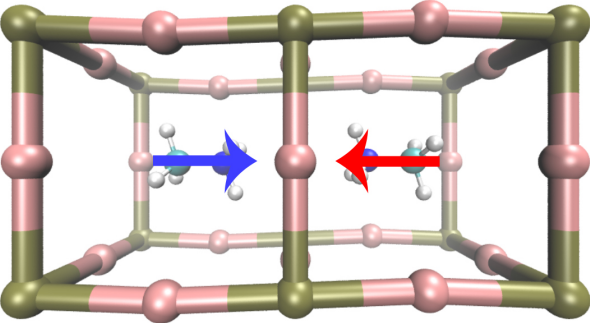

## Bandstructure

b.

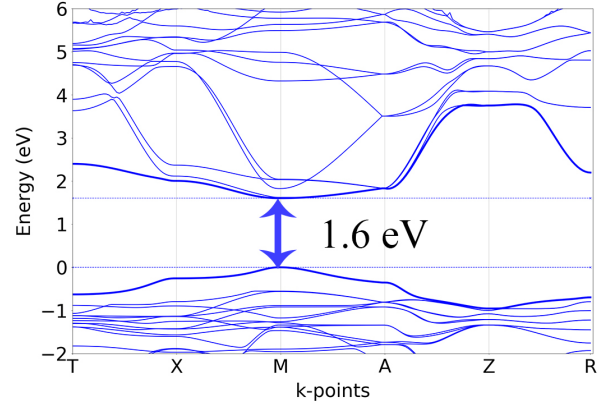

d.

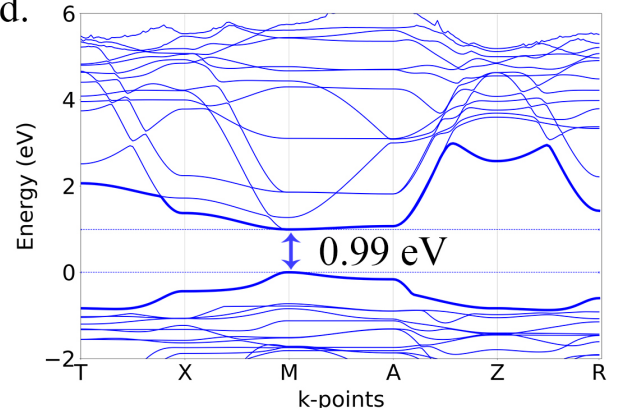

Figure 1: (a) The relaxed geometry for parallel orientation of  $\text{MAPbI}_3$ , (b) Band structure in parallel orientation of dipoles, (c) The relaxed geometry for anti-parallel orientation of  $\text{MAPbI}_3$  and (d) Band structure in anti-parallel orientation of dipoles. The k-points in Brillouin zone are  $T : [0, 0, 0]$ ,  $X : [0, 0, \frac{1}{2}]$ ,  $M : [0, \frac{1}{2}, \frac{1}{2}]$ ,  $A : [\frac{1}{2}, \frac{1}{2}, \frac{1}{2}]$ ,  $Z : [\frac{1}{2}, 0, 0]$ ,  $R : [\frac{1}{2}, 0, \frac{1}{2}]$
